# Supplementary material
Source: PubMed Central journal article supplement (PMC4475875)
Supplement: AEM.00079-15_zam999116348so1.pdf [file AEM.00079-15_zam999116348so1.pdf]

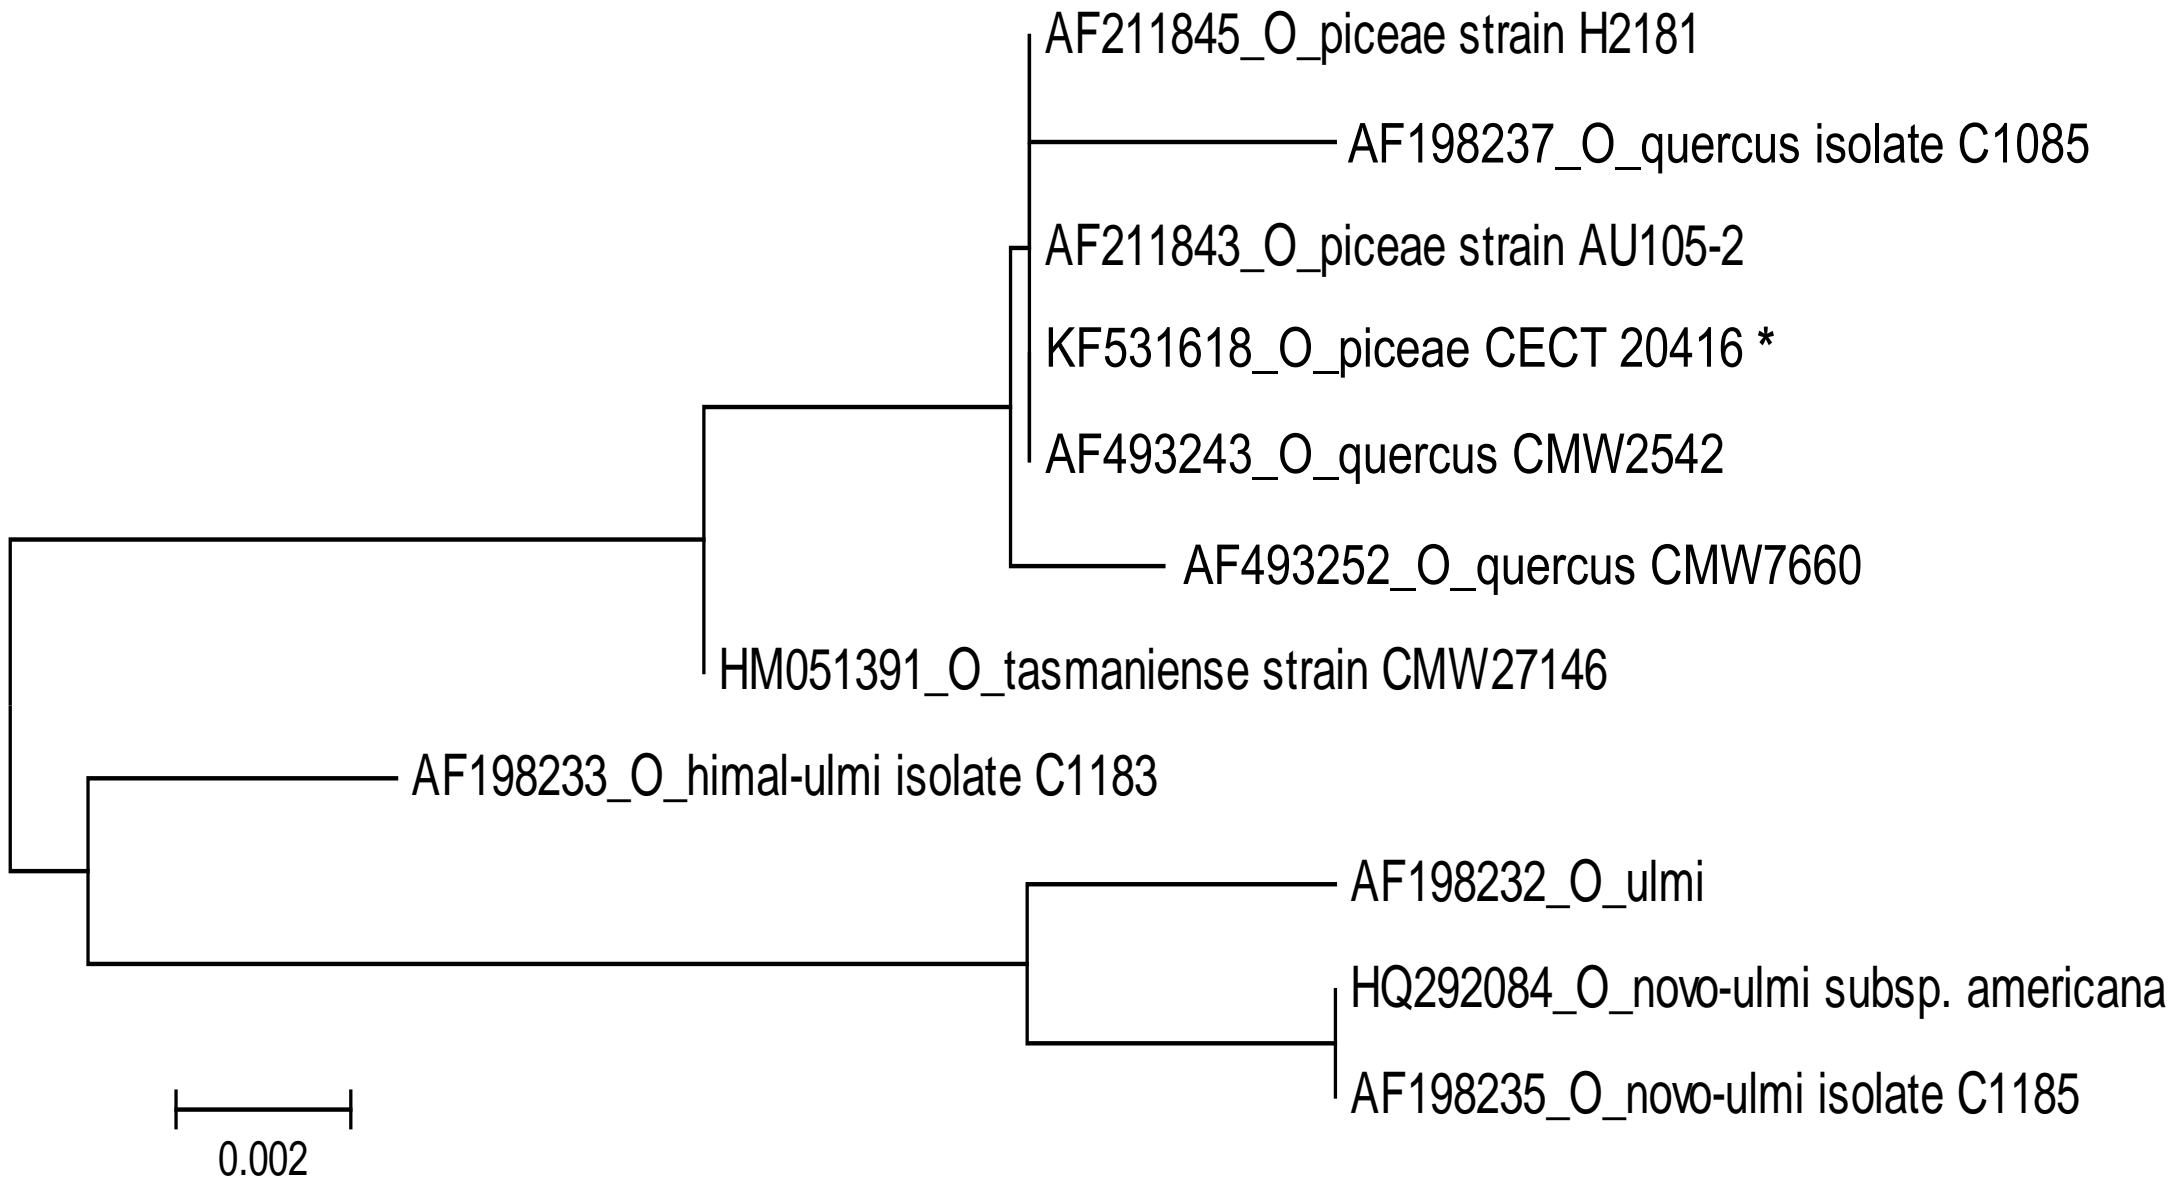

**Figure S1:** Un-rooted phylogenetic tree from the 18S ribosomal RNA gene partial sequence, the internal transcribed spacer 1, the 5.8S ribosomal RNA gene, the internal transcribed spacer 2, and the 28S ribosomal RNA gene partial sequence, of *O. piceae* CECT 20416 and related species.
